# Supplementary material for: The Effects of Synthetic Estrogen Exposure on the Sexually Dimorphic Liver Transcriptome of the Sex-Role-Reversed Gulf Pipefish
Source: PLoS One. 2015 Oct 8;10(10):e0139401. doi: 10.1371/journal.pone.0139401 (PMC4598134; doi:10.1371/journal.pone.0139401)
Supplement: S2 Table — (XLSX) [file pone.0139401.s003.xlsx]

## Sheet: Sheet1
Seq. Name	Seq. Description	UP in preg	Down in Preg	mean NP	mean Preg	C4NPL_GGCTAC.genes.results	C6NPL_ATTCCT.genes.results	C7NPL_CTTGTA.genes.results	C8NPL_ATGTCA.genes.results	C9NPL_ACTTGA.genes.results	C4PL_TAGCTT.genes.results	C6PL_ACTGAT.genes.results	C7PL_CAGATC.genes.results	C8PL_AGTTCC.genes.results	C9PL_TTAGGC.genes.results
c58371_g3_i3		69.7067	0.0143458	0.6	41.824	1	1	0	1	0	6	8	23	171.12	1
c49389_g1_i2	PREDICTED: cornifelin homolog B-like isoform X2 [Stegastes partitus]	20.9733	0.0476796	10.2	213.928	10	3	20	14	4	76	75	24	884.64	10
c54131_g1_i2	PREDICTED: TNFAIP3-interacting protein 2-like isoform X2 [Oreochromis niloticus]	16.5327	0.0604863	8.2	135.568	9	1	15	3	13	1	1	42	11.86	621.98
c49603_g1_i1	PREDICTED: deleted in malignant brain tumors 1 protein-like [Neolamprologus brichardi]	11.375	0.0879121	4.8	54.6	0	4	18	1	1	174	68	28	3	0
c50710_g1_i3	PREDICTED: kinectin-like [Oreochromis niloticus]	10.5467	0.0948161	38	400.776	52	1	22	114	1	473.98	68	55	1373.9	33
c40035_g1_i1	PREDICTED: microfibrillar-associated protein 2 isoform X1 [Stegastes partitus]	10.463	0.0955752	10.8	113	31	3	10	10	0	239	61	20	163	82
c53450_g1_i2	PREDICTED: cyclic nucleotide-gated olfactory channel [Stegastes partitus]	9.26667	0.107914	3	27.8	9	0	6	0	0	3	47	49	34	6
c50237_g1_i2	PREDICTED: hypoxanthine-guanine phosphoribosyltransferase-like [Stegastes partitus]	8.42594	0.118681	3.146	26.508	5	4	3.73	3	0	37.06	0	5.27	32.7	57.51
c51541_g1_i4	PREDICTED: target of Nesh-SH3-like isoform X14 [Oreochromis niloticus]	8.38532	0.119256	21.8	182.8	47	20	25	16	1	75	169	50	611	9
c43661_g1_i2		5.8804	0.170056	5	29.402	4	6	12	0	3	20	13	33.01	28	53
c58172_g6_i1		5.69231	0.175676	2.6	14.8	0	6	2	4	1	12	10	26	21	5
c41505_g1_i1		5.30882	0.188366	13.6	72.2	26	10	14	6	12	7	1	11	334	8
c57601_g5_i1		4.49438	0.2225	3.204	14.4	3	1	0	8.02	4	6	11	18	24	13
c58980_g12_i1	PREDICTED: cryptochrome-1-like isoform X2 [Neolamprologus brichardi]	3.50303	0.285467	26.754	93.72	37.85	12.58	30.3	26.32	26.72	85.87	28.35	70.69	142.88	140.81
c59358_g1_i1	Leucine--tRNA ligase, cytoplasmic, partial [Stegodyphus mimosarum]	3.06952	0.325784	37.4	114.8	2	66	14	53	52	291	63	133	64	23
c58642_g2_i2	nucleotide-binding oligomerization domain-containing protein 2 [Epinephelus coioides]	2.65882	0.376106	34	90.4	44	14	73	19	20	80	26	97	196	53
c87508_g1_i1		2.58537	0.386792	8.2	21.2	7	7	11	10	6	17	13	19	29	28
c43284_g1_i1		2.45522	0.407296	79.804	195.936	31	47.02	183	108	30	186	108.73	247.91	235	202.04
c56772_g4_i1	PREDICTED: protein kinase C zeta type isoform X8 [Poecilia reticulata]	2.20342	0.45384	39.524	87.088	29	16	61.85	50	40.77	67.88	42.79	132.65	109.12	83
c60030_g3_i4	PREDICTED: zinc finger and BTB domain-containing protein 16-A-like [Stegastes partitus]	2.18601	0.457454	71.2	155.644	131	13	74	75	63	109	49	463.22	84	73
c58604_g1_i1	PREDICTED: arylsulfatase D-like [Stegastes partitus]	1.9739	0.506613	27.198	53.686	43	5	45.99	23	19	38	22	77	75.43	56
c60599_g2_i1	PREDICTED: transient receptor potential cation channel subfamily M member 6-like isoform X1 [Oreochromis niloticus]	1.95516	0.511467	31	60.61	47	7	34	49	18	45	30	75.03	114	39.02
c54765_g2_i3	PREDICTED: protocadherin-18-like isoform X1 [Haplochromis burtoni]	1.85981	0.537688	21.4	39.8	32	13	20	33	9	37	13	39	79	31
c36194_g1_i1	PREDICTED: glutathione S-transferase Mu 3-like [Oryzias latipes]	1.73864	0.575161	537.2	934	577	245	704	947	213	853	385	1104	1647	681
c60425_g1_i1	PREDICTED: neurexin-2-like isoform X1 [Oreochromis niloticus]	1.68409	0.593793	32.028	53.938	19	10	39	61.14	31	48.69	26	55	93	47
c57513_g2_i1	PREDICTED: neuropathy target esterase [Stegastes partitus]	1.59437	0.627208	425	677.606	681	162	622	365	295	648	369	722	1136	513.03
c59853_g2_i1		1.52403	0.656154	189.988	289.548	326.05	179.87	284	53	107.02	124.22	118.54	253.92	111	840.06
c54198_g2_i1	PREDICTED: uncharacterized protein LOC103364994 [Stegastes partitus]	1.48058	0.675412	72.6	107.49	83	30	94	95	61	115	41	87	210.45	84
c59669_g3_i1	PREDICTED: mitogen-activated protein kinase kinase kinase kinase 4-like isoform X2 [Oreochromis niloticus]	1.42406	0.702217	83.002	118.2	108	30	124	81	72.01	98	55	125	180	133
c45599_g1_i1	PREDICTED: T-complex protein 1 subunit gamma [Stegastes partitus]	0.680214	1.47013	634.8	431.8	781	247	868	817	461	423	135	411	788	402
c59757_g2_i6	Protein scribble homolog [Dicentrarchus labrax]	0.665468	1.5027	497.352	330.972	608.81	195.01	554.87	719.07	409	318.05	99	380.7	557.37	299.74
c57247_g1_i6	PREDICTED: rho GTPase-activating protein 18 isoform X1 [Cynoglossus semilaevis]	0.402716	2.48314	501.594	202	490	151	689	576	601.97	191	83	291	220	225
c51603_g1_i4	PREDICTED: bcl-2-related ovarian killer protein homolog A [Stegastes partitus]	0.286215	3.49388	102.72	29.4	11	77.6	218	6	201	10	49	39	26	23
c38867_g1_i1	PREDICTED: diamine acetyltransferase 1-like [Oreochromis niloticus]	0.285491	3.50273	357.398	102.034	526.86	322	63	79.01	796.12	222	44	39.1	107	98.07
c59557_g1_i1	PREDICTED: ribosome biogenesis protein BMS1 homolog isoform X1 [Haplochromis burtoni]	0.266446	3.7531	27.21	7.25	34.4	3	36.11	42.27	20.27	4.54	4	3.35	17.7	6.66
c60484_g2_i4	PREDICTED: adenylate cyclase type 2-like [Oryzias latipes]	0.264411	3.78199	146.204	38.658	166.86	25.3	203.24	203.15	132.47	21.28	9.89	78.02	49.95	34.15
c60797_g1_i3	PREDICTED: protocadherin-16-like [Oreochromis niloticus]	0.246019	4.06472	175.596	43.2	268	135	237.98	154.01	82.99	19	28	88	65	16
c60065_g2_i4	PREDICTED: mitogen-activated protein kinase kinase kinase 5 [Stegastes partitus]	0.162162	6.16667	81.4	13.2	149	27	42	149	40	31	11	9	11	4
c43851_g1_i1	PREDICTED: trichohyalin-like [Oreochromis niloticus]	0.16185	6.17857	69.2	11.2	18	3	6	9	310	8	2	18	7	21
c59272_g5_i1	PREDICTED: creatine kinase M-type-like [Oreochromis niloticus]	0.100189	9.98113	211.6	21.2	976	2	48	31	1	81	1	11	8	5
c53630_g1_i1	cartilage acidic protein 2 [Sparus aurata]	0.0380952	26.25	21	0.8	0	0	24	38	43	1	0	0	1	2
